# Supplementary material for: Synthesis and photovoltaic properties of a D–A copolymer of dithienosilole and fluorinated-benzotriazole
Source: Royal Society of Chemistry journal article supplement (doi:10.1039/c2py20982a), 2012-12-03
Supplement: c2py20982a.pdf [file c2py20982a.pdf]

## Supporting Information

### Synthesis and Photovoltaic Properties of a D-A Copolymer of Dithienosilole and Fluorinated-Benzotriazole

Jie Min, Zhi-Guo Zhang\*, Maojie Zhang, Yongfang Li\*

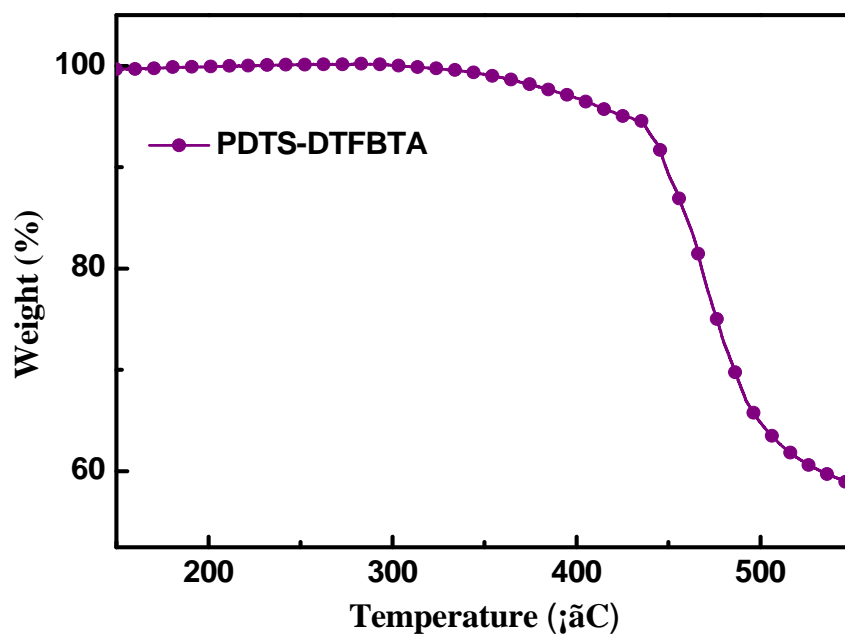

**Figure S1.** TGA plots of the polymer with a heating rate of  $10\text{ }^{\circ}\text{C}\cdot\text{min}^{-1}$  under inert atmosphere.

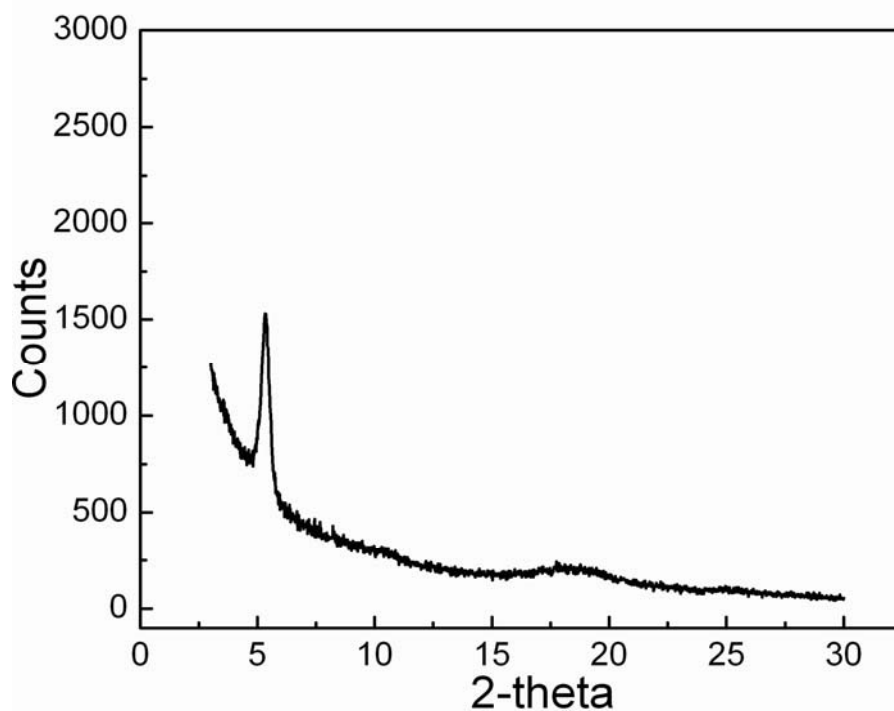

**Figure S2.** X-ray diffraction patterns of the film drop-cast onto a silicon substrate.

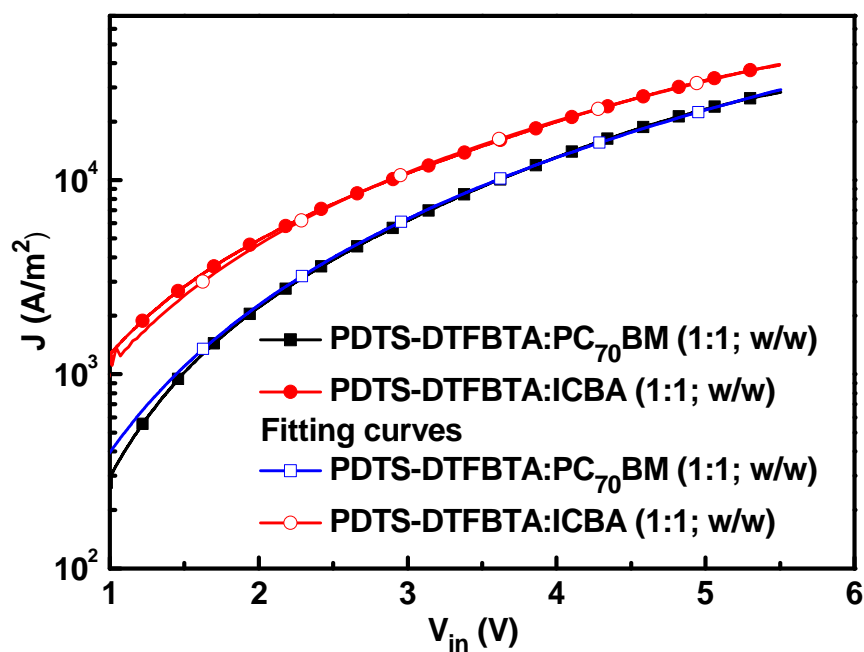

**Figure S3.** hole mobility of PDTS-DTFBTA:PC<sub>70</sub>BM and PDTS-DTFBTA:ICBA blend films with thermal treatment.
